# Supplementary material for: Nitrogen and oxygen isotopic constraints on the origin of atmospheric nitrate in coastal Antarctica
Source: Copernicus journal article supplement (doi:10.5194/acp-7-1925-2007), 2007-04-18
Supplement: Supplementary file 1 [file Figure_S1.doc]

Supplemental materials

**
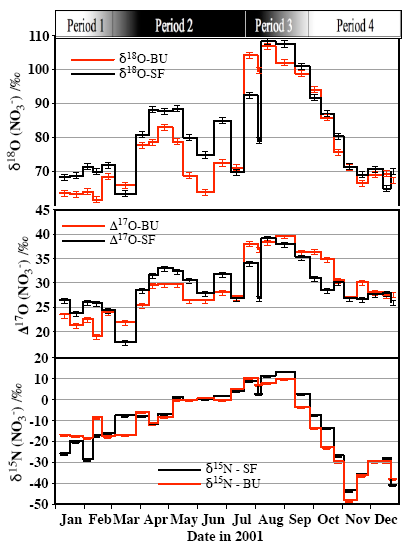
**

Figure S1: Time-series comparison of δ18O, Δ17O and δ15N(NO3-) found on the backup fiber glass filter (BU) and on slotted fiber glass filters (SF). No fundamental differences in the seasonal trend exist between the two categories of filters. Consequently, we merged SF and BU signals in one weighted average seasonal time series.
