# Supplementary material for: Nitrogen and oxygen isotopic constraints on the origin of atmospheric nitrate in coastal Antarctica
Source: Copernicus journal article supplement (doi:10.5194/acp-7-1925-2007), 2007-04-18
Supplement: Supplementary file 3 [file Table_S1.doc]

Table S1: Stable isotopic compositions of nitrate aerosols found BU and SF filters. The former filters collect aerosols with a cutoff dynamic diameter lower than 1 μm, the latter above 1 μm. All isotopic values are reported against their respective international standard. δ18O’s obtained by two different analytical techniques (i.e. catalytic decomposition of N2O on gold and the denitrifier N2O method) are also reported. The following database was merged in mass weighted average seasonal isotopic signals.

| **Dates** | **Concentration (ng/m3, STP)** | | **δ18Osmow/‰**  **(N2O decomp.)** | | **δ17Osnow/‰**  **(N2O decomp.)** | | **δ15Nair/‰**  **(N2O denitrifier)** | | **δ18Osmow/‰**  **(N2O denitrifier)** | |
| --- | --- | --- | --- | --- | --- | --- | --- | --- | --- | --- |
| **BU** | **SF** | **BU** | **SF** | **BU** | **SF** | **BU** | **SF** | **BU** | **SF** |
| 06/01/01 | 25.4 | 17.7 | 60.7 | 66.5 | 54.7 | 62.3 | -16.7 | -25.6 | 63.4 | 68.4 |
| 16/01/01 | 8.0 | 5.9 | 61.3 | 65.0 | 53.3 | 58.9 | -17.3 | -19.9 | 62.9 | 69.0 |
| 30/01/01 | 16.5 | 11.0 | 60.8 | 68.5 | 54.3 | 63.5 | -18.1 | -28.6 | 63.8 | 71.7 |
| 09/02/01 | 13.1 | 9.0 | 54.3 | 67.3 | 47.4 | 62.2 | -8.4 | -17.0 | 59.7 | 70.3 |
| 19/02/01 | 8.7 | 8.8 | 63.5 | 69.6 | 56.3 | 62.3 | -17.4 | -15.8 | 68.4 | 72.2 |
| 05/03/01 | 4.4 | 5.9 | 64.2 | 58.5 | 55.1 | 49.2 | -16.8 | -7.5 | 65.1 | 61.0 |
| 27/03/01 | 5.9 | 5.2 | 75.9 | 79.6 | 66.0 | 72.0 | -5.8 | -7.8 | 78.2 | 82.0 |
| 10/04/01 | 10.1 | 7.3 | 81.4 | 89.2 | 72.4 | 80.2 | -11.3 | -11.5 | 79.2 | 89.9 |
| 19/04/01 | 6.0 | 5.1 | 85.7 | 84.7 | 76.2 | 78.1 | -8.3 | -6.8 | 81.3 | 89.2 |
| 05/05/01 | 8.0 | 7.8 | 82.0 | 90.1 | 74.5 | 81.7 | 0.0 | 1.1 | 77.0 | 89.8 |
| 16/05/01 | 5.9 | 4.6 | 70.9 | 79.9 | 64.8 | 74.3 | 0.0 | 0.0 | 66.4 | 81.1 |
| 31/05/01 | 5.2 | 4.0 | 67.1 | 75.2 | 62.4 | 69.3 | 0.7 | 0.4 | 62.9 | 75.6 |
| 18/06/01 | 6.8 | 5.5 | 71.4 | 84.8 | 68.2 | 79.3 | -0.3 | 2.0 | 73.4 | 85.2 |
| 06/07/01 | 18.2 | 4.2 | 70.2 | 69.3 | 65.7 | 65.7 | 5.2 | 4.2 | 69.0 | 71.0 |
| 19/07/01 | 10.8 | 3.5 | 105.1 | 97.1 | 96.6 | 89.1 | 10.3 | 8.8 | 103.9 | 95.0 |
| 03/08/01 | 45.0 | 10.0 | 102.1 | 77.5 | 92.2 | 69.4 | 7.2 | 2.8 | 103.2 | 80.6 |
| 07/08/01 | 9.2 | 13.6 | 112.3 | 110.8 | 100.2 | 101.4 | 7.9 | 11.5 | 105.9 | 109.2 |
| 22/08/01 | 35.7 | 13.6 | 111.3 | 110.0 | 101.2 | 99.8 | 9.7 | 13.4 | 106.8 | 108.7 |
| 12/09/01 | 16.2 | 19.3 | 107.9 | 94.7 | 95.4 | 87.2 | -3.6 | 2.8 | 99.6 | 101.5 |
| 27/09/01 | 44.2 | 10.9 | 99.0 | 93.8 | 91.4 | 83.5 | -13.5 | -7.3 | 95.0 | 93.1 |
| 09/10/01 | 48.2 | 10.3 | 93.4 | 80.4 | 87.2 | 73.4 | -22.7 | -13.5 | 92.3 | 87.7 |
| 23/10/01 | 76.3 | 18.5 | 85.6 | 81.4 | 77.4 | 74.8 | -29.4 | -26.6 | 81.8 | 80.9 |
| 02/11/01 | 65.6 | 18.7 | 75.6 | 72.0 | 68.2 | 66.7 | -48.0 | -43.2 | 72.7 | 71.6 |
| 16/11/01 | 117.9 | 40.5 | 73.9 | 68.8 | 71.2 | 64.2 | -36.0 | -35.7 | 68.3 | 69.1 |
| 28/11/01 | 114.7 | 50.7 | 74.7 | 73.2 | 68.6 | 67.7 | -29.3 | -29.1 | 66.8 | 68.7 |
| 14/12/01 | 97.4 | 57.5 | 74.9 | 67.6 | 67.8 | 63.9 | -29.4 | -27.9 | 71.0 | 65.0 |
| 22/12/01 | 71.1 | 30.4 | 72.3 | 66.7 | 66.7 | 61.2 | -37.3 | -40.2 | 66.0 | 70.0 |
